# Supplementary material for: Synthesis and properties of temperature-sensitive and chemically crosslinkable poly(ether-urethane) hydrogel
Source: Royal Society of Chemistry journal article supplement (doi:10.1039/c5py00181a), 2015-01-01
Supplement: c5py00181a1.pdf [file c5py00181a1.pdf]

## Supplementary Information for

### Synthesis and Properties of Temperature-Sensitive and Chemically Crosslinkingable Poly(ether-urethane) Hydrogel

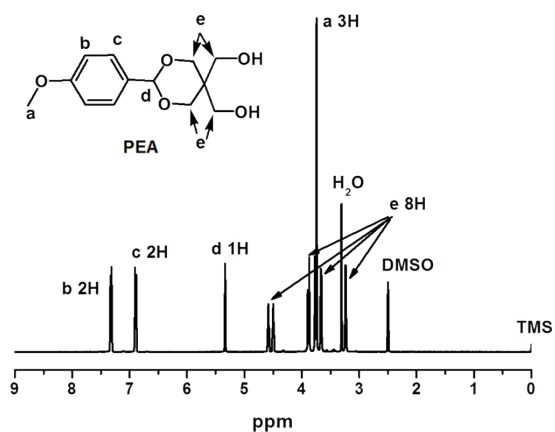

Figure S1. <sup>1</sup>H-NMR spectrum of MAP.

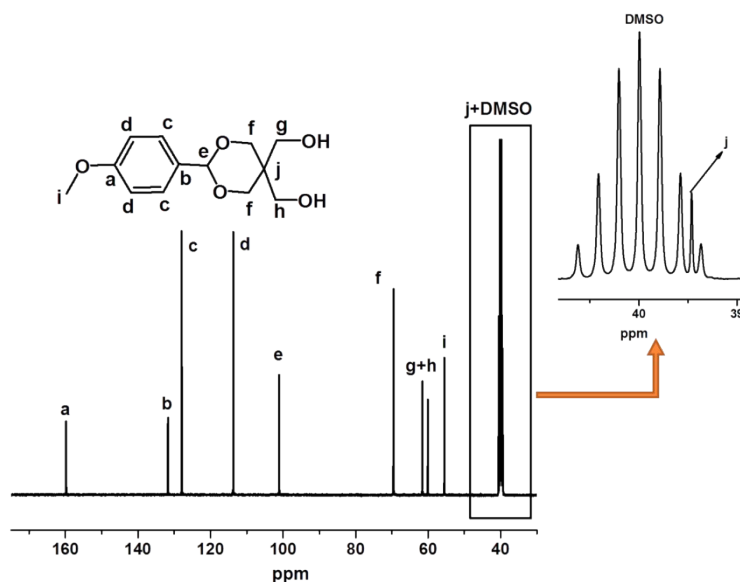

Figure S2. <sup>13</sup>C-NMR spectrum of MAP.

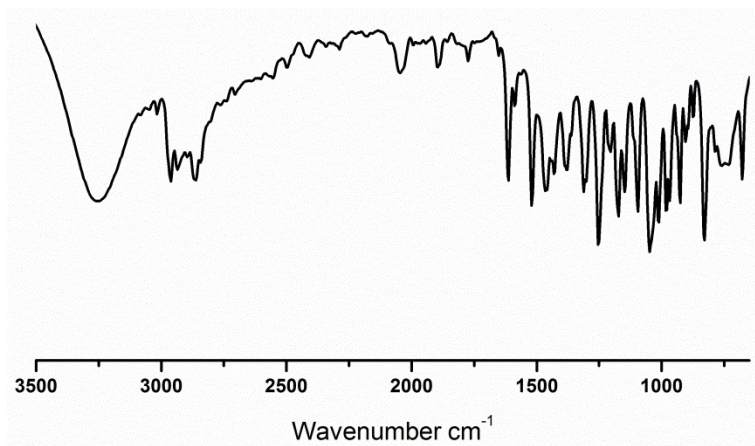

Figure S3. FT-IR spectrum of MAP.

---

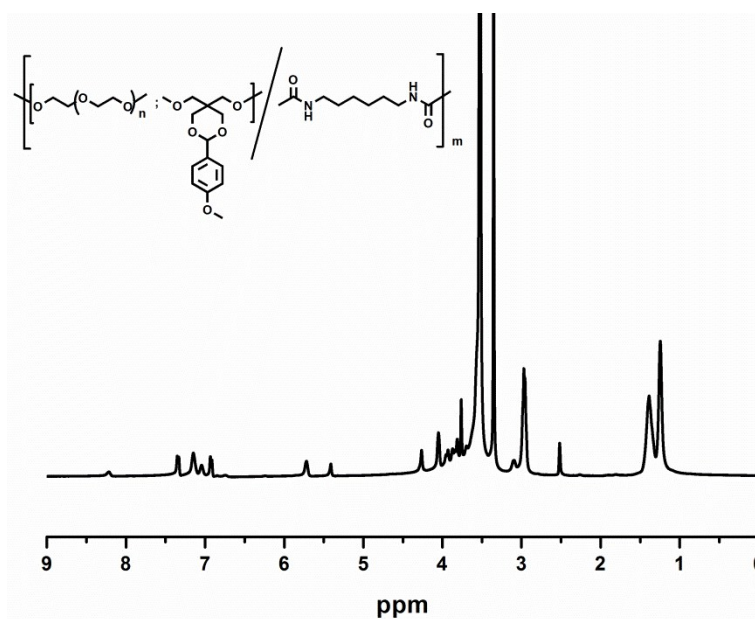

Figure S4. <sup>1</sup>H-NMR spectrum of PEU-MAP.

---

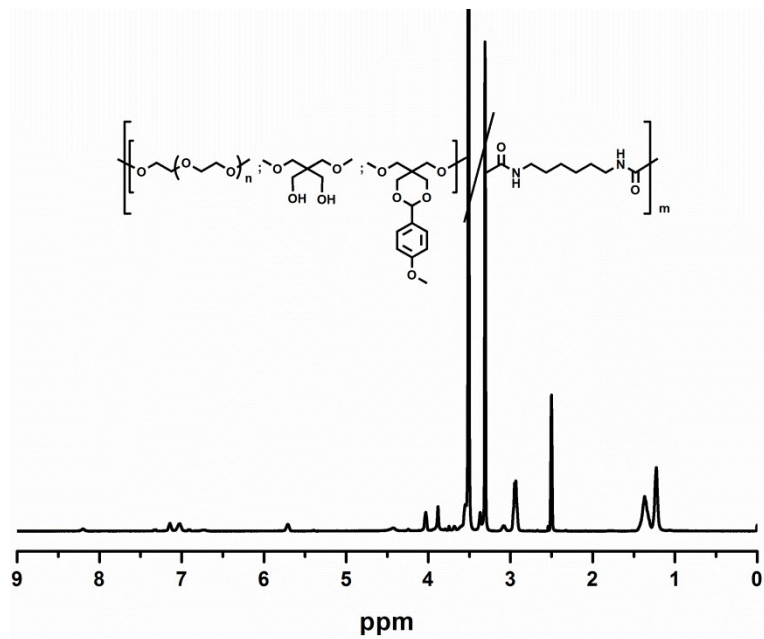

Figure S5. <sup>1</sup>H-NMR spectrum of hydrolysed PEU-MAP.

---

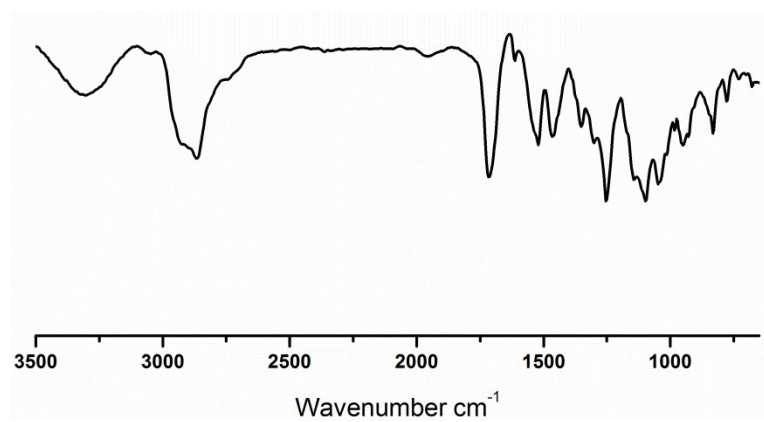

Figure S6. FT-IR spectrum of hydrolysed PEU-MAP.

---

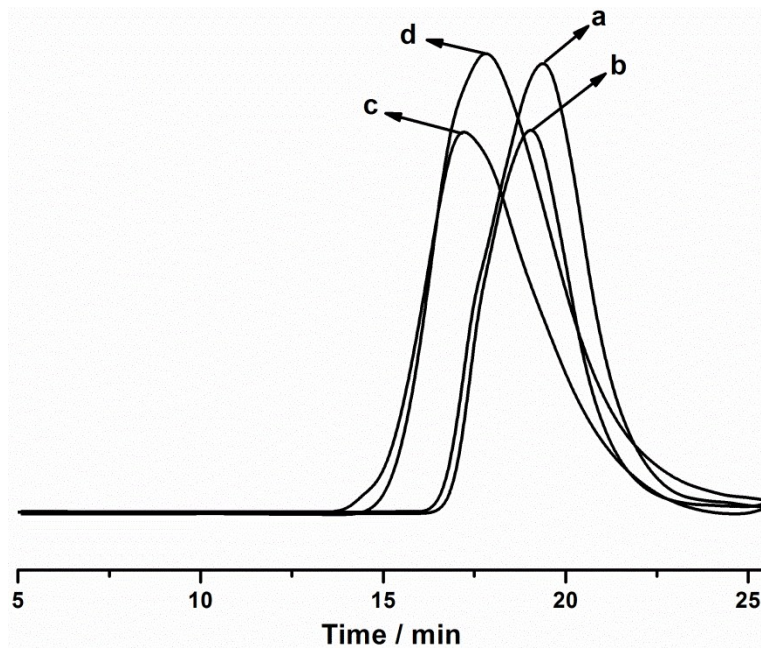

Figure S7. Stacked SEC spectra of PEU1000-MA (a), PEU2000-MA (b), PEU1000-MAP (c), and PEU2000-MAP (d).

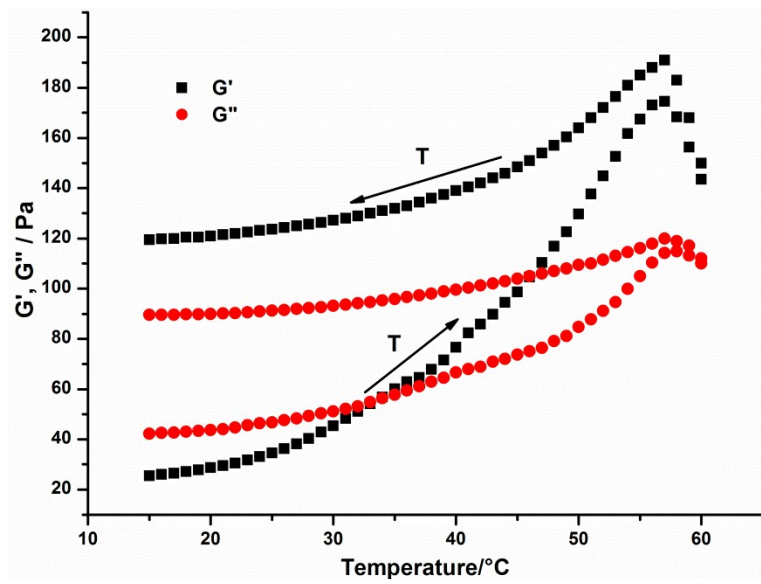

Figure S8. Rheology properties of PEU2000-100MA solutions warming from 15 to 60 °C and then cooling from 60 to 15 °C without any initiator.

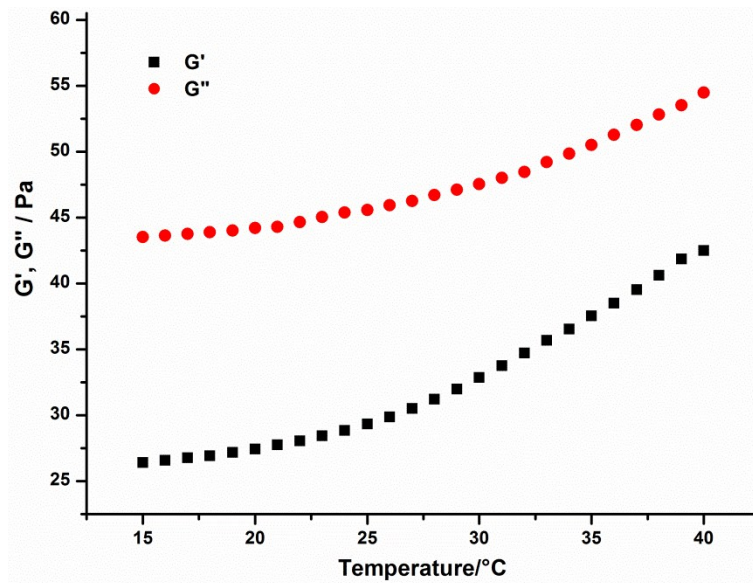

Figure S9. Rheology properties of PEU1000-100MA solutions at different temperature.

---

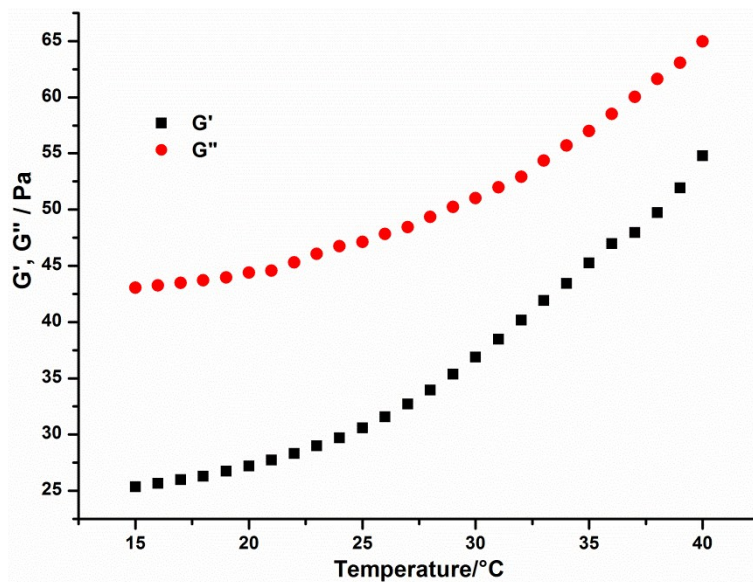

Figure S10. Rheology properties of PEU2000-56MA solutions at different temperature.

---

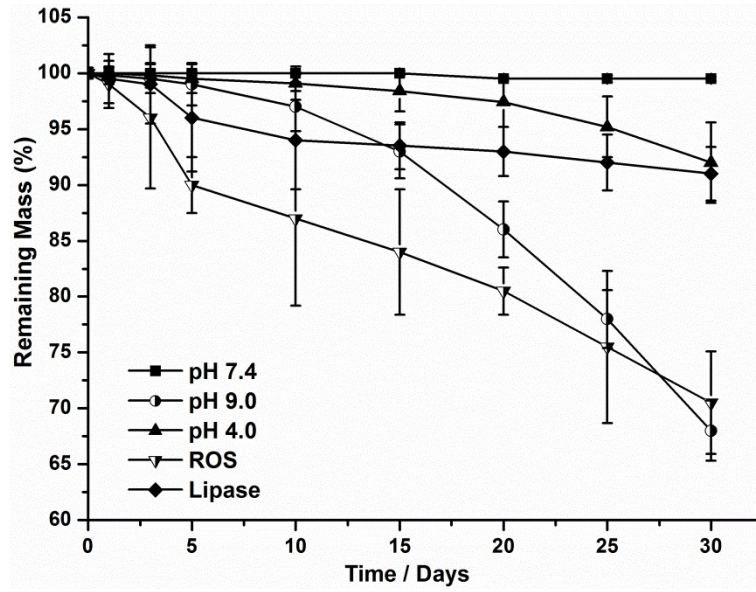

Figure S11. *In vitro* degradations of photocured PEU1000-100MA gels at different conditions.

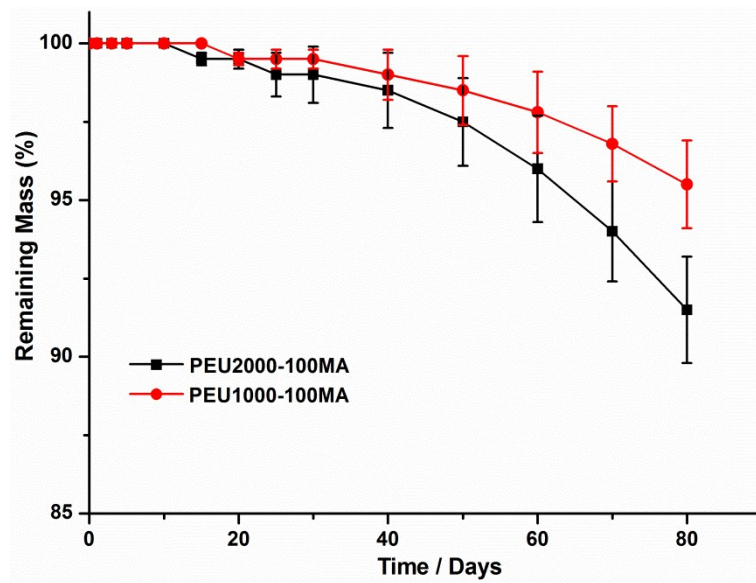

Figure S12. *In vitro* degradations of photocured PEU1000-100MA and PEU2000-100MA gels at pH 7.4 for 80 days.

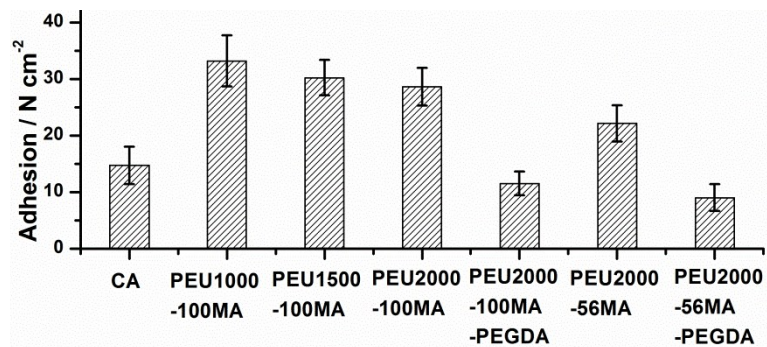

Figure S13. Adhesions on the glass slide with different PEU dried hydrogels and medical-grade cyanoacrylate (CA), which were dried under vacuum at 50 °C.

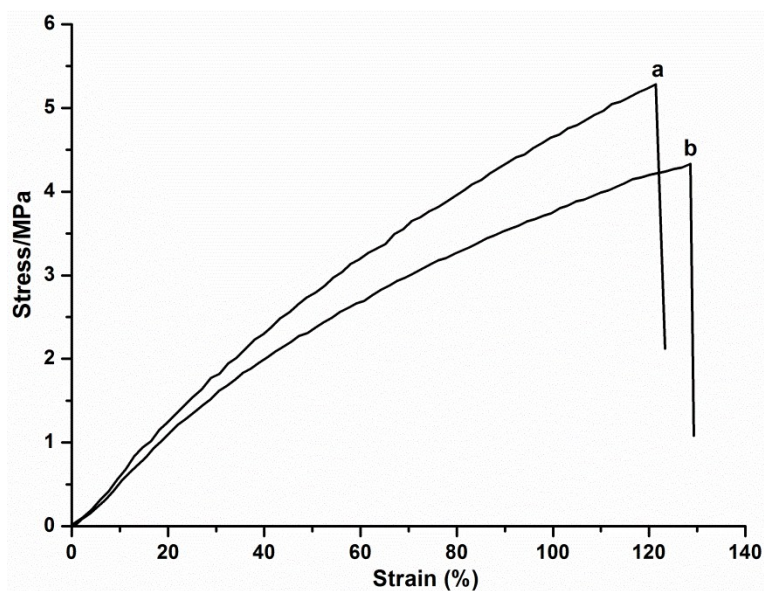

Figure S14. Stress-strain curves of the gel membranes of PEU2000-21MA (a), PEU2000-21MA-PEGDA (b)

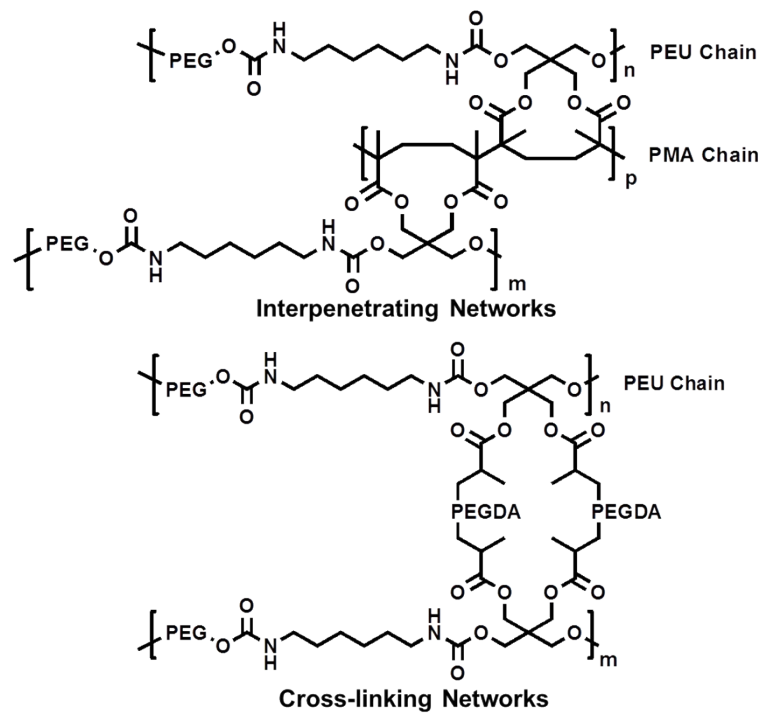

Figure S15. Different networks of PEU-MA and PEU-MA-PEGDA.
